# Supplementary material
Source: PubMed Central journal article supplement (PMC3697030)
Supplement: NIHMS484427-supplement-01.pdf [file NIHMS484427-supplement-01.pdf]

**SUPPLEMENTARY TABLE 1**

Composition of Purified Diets

| Diet <sup>a</sup>                     | D07030301 | D07030304<br>(+Soy Protein) | D09080401<br>(+Genistein) | D09080402<br>(+Daidzein) |
|---------------------------------------|-----------|-----------------------------|---------------------------|--------------------------|
| <b>Ingredient (g/kg)</b>              |           |                             |                           |                          |
| casein, 80 mesh                       | 177       | 0                           | 177                       | 177                      |
| soy protein <sup>b</sup> , SUPRO® 661 | 0         | 177                         | 0                         | 0                        |
| DL-methionine                         | 0         | 2.9                         | 0                         | 0                        |
| L-cystine                             | 2.9       | 0                           | 2.9                       | 2.9                      |
| corn starch                           | 423       | 423                         | 423                       | 423                      |
| maltodextrin 10                       | 122.7     | 122.7                       | 122.7                     | 122.7                    |
| Inulin                                | 24.5      | 24.5                        | 24.5                      | 24.5                     |
| cellulose, BW200                      | 73.6      | 73.6                        | 73.6                      | 73.6                     |
| soybean oil                           | 115.8     | 115.8                       | 115.8                     | 115.8                    |
| choline bitartrate                    | 2         | 2                           | 2                         | 2                        |
| mineral mix S10026B <sup>c</sup>      | 49.1      | 49.1                        | 49.1                      | 49.1                     |
| vitamin mix V10001 <sup>d</sup>       | 9.8       | 9.8                         | 9.8                       | 9.8                      |
| genistein                             | 0         | 0                           | 0.750                     | 0                        |
| daidzein                              | 0         | 0                           | 0                         | 0.750                    |
| dye <sup>e</sup>                      | 0         | 0.05                        | 0.05                      | 0.05                     |

<sup>a</sup>Purified diets were formulated by Research Diets, Inc. (New Brunswick, NJ), catalog numbers: purified diet (D07030301), purified diet with soy protein substituted for casein protein (D07030304), purified diet supplemented with genistein (D09080401) and purified diet supplemented with daidzein (D09080402).

<sup>b</sup>Solae isolated soy protein, SUPRO® 661.

<sup>c</sup>Mineral mix ingredients (g/kg): calcium phosphate, dibasic, 29.5% calcium, 22.8% phosphate (260 g); calcium carbonate, 39.3% calcium (110 g); potassium citrate, 1 H<sub>2</sub>O, 36.2% potassium (330 g); sodium chloride, 39.3% sodium, 60.7% chlorine (51.8 g); magnesium oxide, 60.3% magnesium (8.38 g); magnesium sulfate, 7 H<sub>2</sub>O, 9.87% magnesium, 13.0% sulfur (51.52 g); chromium K sulfate, 12 H<sub>2</sub>O, 10.4% chromium (385 mg); cupric carbonate, 57.5% copper (210 mg); sodium fluoride, 45.2% fluoride (40 mg); potassium iodate, 59.3% iodine (7 mg); ferric citrate, 21.2% iron (4.2 g); manganous carbonate, 47.8% manganese (2.45 g); ammonium molybdate, 4 H<sub>2</sub>O, 54.3% molybdenum (60 mg); sodium selenite, 45.7% selenium (7 mg); zinc carbonate, 52.1% zinc (1.12 g); and sucrose (179.821 g) to 1 kg.

<sup>d</sup>Vitamin mix ingredients (g/kg): vitamin A palmitate, 500,000 IU/g (0.8 g), vitamin D<sub>3</sub>, 100,000 IU/g (1.0 g), vitamin E acetate, 500 IU/g (10.0 g), menadione sodium bisulfite, 62.5% menadione (80 mg), biotin, 1.0% (2.0 g), cyanocobalamin, 0.1% (1.0 g), folic acid (0.2 g), nicotinic acid (3.0 g), calcium pantothenate (1.6 g), pyridoxine-HCl (0.7 g), riboflavin (0.6 g), thiamin HCl (0.6 g) and sucrose (978.42 g) to 1 kg.

<sup>e</sup>Diets were colored with FD&C red dye #40 (D07030304 and D09080401) or with FD&C blue dye #1 (D09080402).
